# Supplementary material for: Lucigenin/Co(tryptophan)2complex bifunctionalized graphene oxide: facile synthesis and unique chemiluminescence
Source: Royal Society of Chemistry journal article supplement (doi:10.1039/c6tc00072j), 2016-01-01
Supplement: c6tc00072j1.pdf [file c6tc00072j1.pdf]

**Lucigenin/Co(tryptophan)<sub>2</sub> complex bifunctionalized graphene oxide: facile  
synthesis and unique chemiluminescence**

**Supporting information**

Qi Li,<sup>†a</sup> Fang Li,<sup>†b</sup> Wen Shen,<sup>a</sup> Xiangyang Liu<sup>a</sup> and Hua Cui<sup>\*a</sup>

<sup>a</sup>CAS Key Laboratory of Soft Matter Chemistry, Collaborative Innovation Center of Chemistry for Energy Materials, Department of Chemistry, University of Science and Technology of China, Hefei, Anhui 230026, P.R. China.

<sup>b</sup>Department of Applied Chemistry, School of Chemistry and Chemical Engineering, Hefei University of Technology, Hefei, Anhui 230009, P.R. China

<sup>†</sup>The authors are co-first authors and contributed equally to this work.

\* Corresponding author. Prof. H. Cui,

Tel: +86 551 63606645

Fax: +86 551 63600730

Email: [hcui@ustc.edu.cn](mailto:hcui@ustc.edu.cn)

### S1. CL property of metal ion catalyzed Luc/GO-H<sub>2</sub>O<sub>2</sub> CL reaction

The catalytic effect of various metal ions such as Co<sup>2+</sup>, Ni<sup>2+</sup>, Mn<sup>2+</sup>, Pb<sup>2+</sup> and Cu<sup>2+</sup> on the CL reaction of Luc/GO with H<sub>2</sub>O<sub>2</sub> in alkaline solution was investigated by simply mixing different metal ions with Luc/GO. 10  $\mu$ L of 0.5 mM metal ions was mixed into 1 mL as-prepared Luc/GO. Then 200  $\mu$ L 10 mM H<sub>2</sub>O<sub>2</sub> in 0.1 M NaOH was injected into above solution. CL signal was measured with a BPLC luminometer and PMT voltage was set at -600 V.

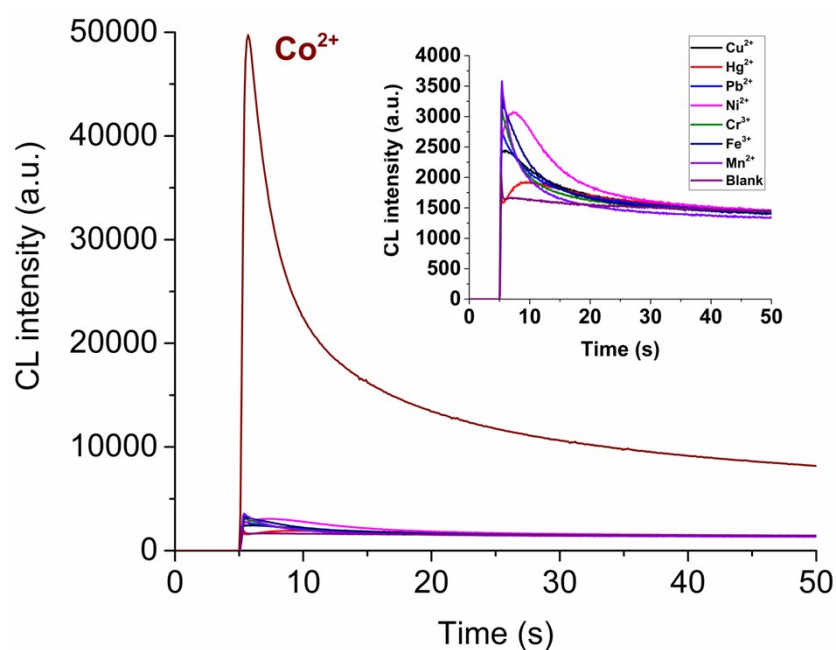

**Fig. S1.** CL kinetic curves for reaction between Luc/GO and different metal ions (Co<sup>2+</sup>, Cu<sup>2+</sup>, Hg<sup>2+</sup>, Ni<sup>2+</sup>, Cr<sup>3+</sup>, Fe<sup>3+</sup>, and Mn<sup>2+</sup>). The inset is the magnification.

## S2. Optimization of experimental conditions

The experimental conditions for the synthesis of  $\text{Co(Trp)}_2/\text{Luc/GO}$  from  $\text{Luc/GO}$  were optimized. The CL intensity of  $\text{Co(Trp)}_2/\text{Luc/GO}$  increased with the increase of the temperature when assembled  $\text{Co(Trp)}_2$  onto  $\text{Luc/GO}$ . It was due to that more  $\text{Co(Trp)}_2$  complexes could be adsorbed onto the surface of  $\text{Luc/GO}$  result from the thermodynamic equilibrium result. However, when the temperature was higher than  $40\text{ }^\circ\text{C}$ , the stability of  $\text{Co(Trp)}_2/\text{Luc/GO}$  decreased. Meanwhile, the best interaction reaction time for the assembly of  $\text{Co(Trp)}_2$  onto  $\text{Luc/GO}$  was about 6 hours. In addition, the integral value of the CL intensity over 10 seconds increased with the increase of the concentration of  $\text{Co(Trp)}_2$  from  $50\text{ }\mu\text{M}$  to  $100\text{ }\mu\text{M}$ . However, the CL signal decreased when the concentration of  $\text{Co(Trp)}_2$  was above  $50\text{ }\mu\text{M}$ . The concentration of  $\text{Co(Trp)}_2$  was optimized around  $50\text{ }\mu\text{M}$ .

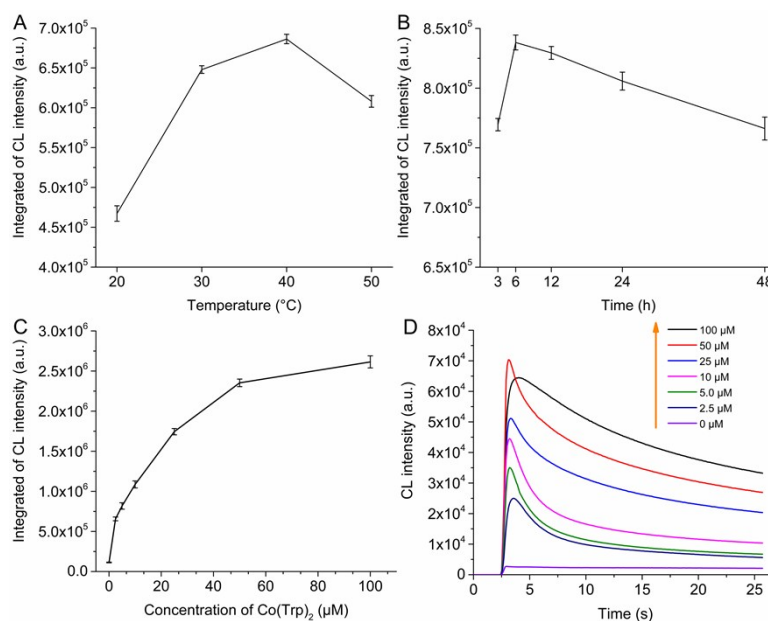

**Fig. S2.** Optimization of the conditions of synthetic  $\text{Co(Trp)}_2/\text{Luc/GO}$  from  $\text{Luc/GO}$ , (A) temperature, (B) time, (C) concentration of  $\text{Co(Trp)}_2$  and (D) CL behavior of  $\text{Co(Trp)}_2/\text{Luc/GO}$  prepared with different concentration of  $\text{Co(Trp)}_2$ .  $200\text{ }\mu\text{L}$   $10\text{ mM}$   $\text{H}_2\text{O}_2$  in  $0.1\text{ M}$   $\text{NaOH}$  was injected into  $\text{Co(Trp)}_2/\text{Luc/GO}$ . CL signal was measured with a BPLC luminometer and PMT voltage was set at  $-600\text{ V}$ .

### S3. Characterization of Co(Trp)<sub>2</sub>/Luc/GO hybrids

#### HRTEM Characterization of Co(Trp)<sub>2</sub>/Luc/GO hybrids

The specimen of HRTEM was prepared by dropping the sample on to a copper net covered by a carbon film.

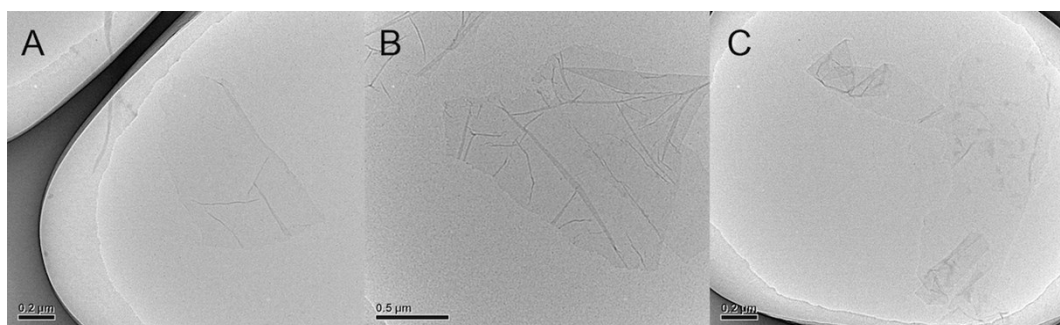

**Fig. S3.** TEM images of (A) GO, (B) Luc/GO and (C) Co(Trp)<sub>2</sub>/Luc/GO.

#### Determination of lucigenin concentration in Luc/GO hybrids

The concentration of lucigenin in Luc/GO hybrids was determined by FL analysis. 100 μL different concentrations of lucigenin (1-50 μM) was added into 900 μL supernatant of GO centrifuged at a speed of 15,000 rpm for 10 min. The FL intensity of above solutions was recorded at 490 nm (ex: 262 nm). The results indicated that the FL intensity increased linearly with the increase of lucigenin concentration as shown in Fig. S4. The regression equation is  $I = 10.488 + 45.431 \times C$  with a regression coefficient of 0.9978. 100 μL ultrapure water was added into 900 μL supernatant of Luc/GO centrifuged at a speed of 15,000 rpm for 10 min, and recorded the FL intensity at the same condition. The amount of lucigenin absorbed on the GO surface approximately equals to that the synthetic lucigenin concentration subtracts the concentration of free lucigenin in the supernatant, which was calculated as about 4 μM.

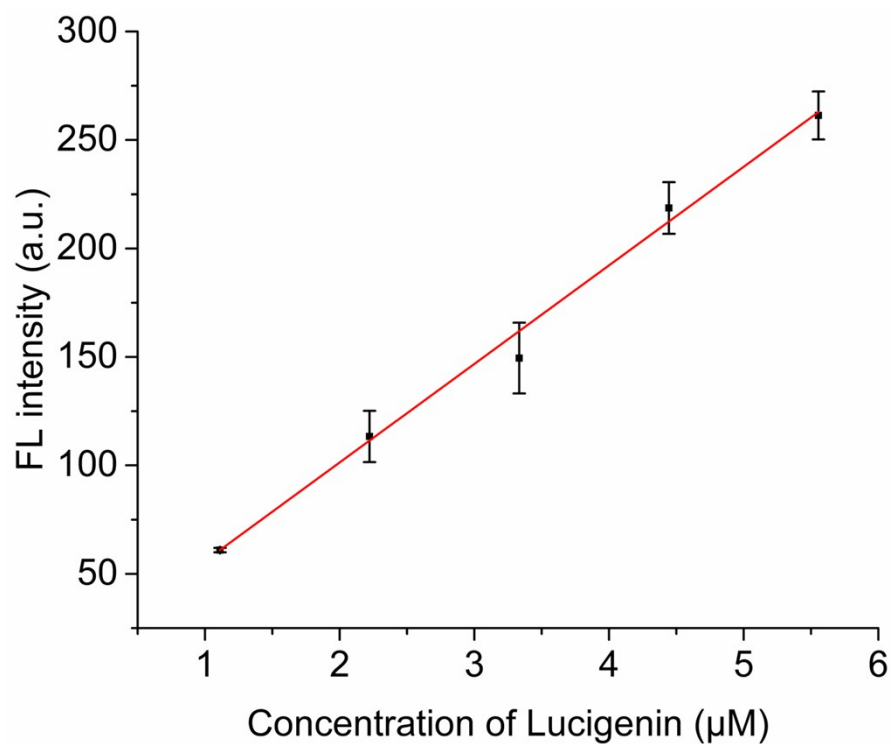

**Fig. S4.** Calibration curve for lucigenin concentration.

### XPS characterization of Co(Trp)<sub>2</sub>/Luc/GO

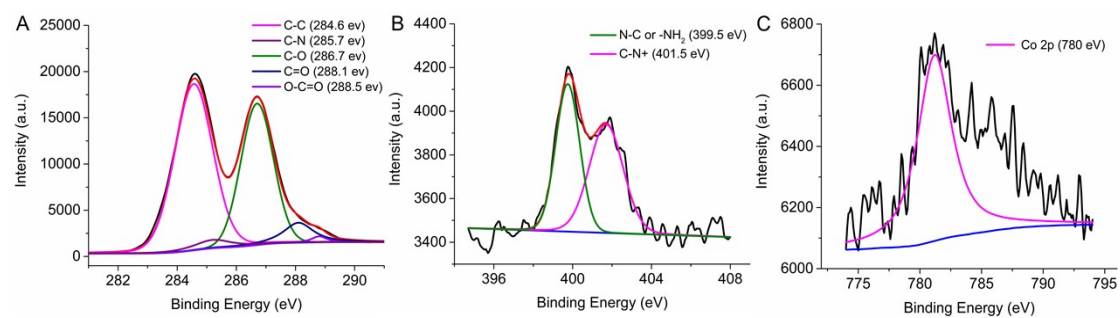

**Fig. S5.** XPS spectrum of (A) C 1s, (B) N 1s, (C) Co 2p from Co(Trp)<sub>2</sub>/Luc/GO.

#### S4. CL mechanism of $\text{Co}(\text{Trp})_2/\text{Luc}/\text{GO}-\text{H}_2\text{O}_2$ in alkaline solution

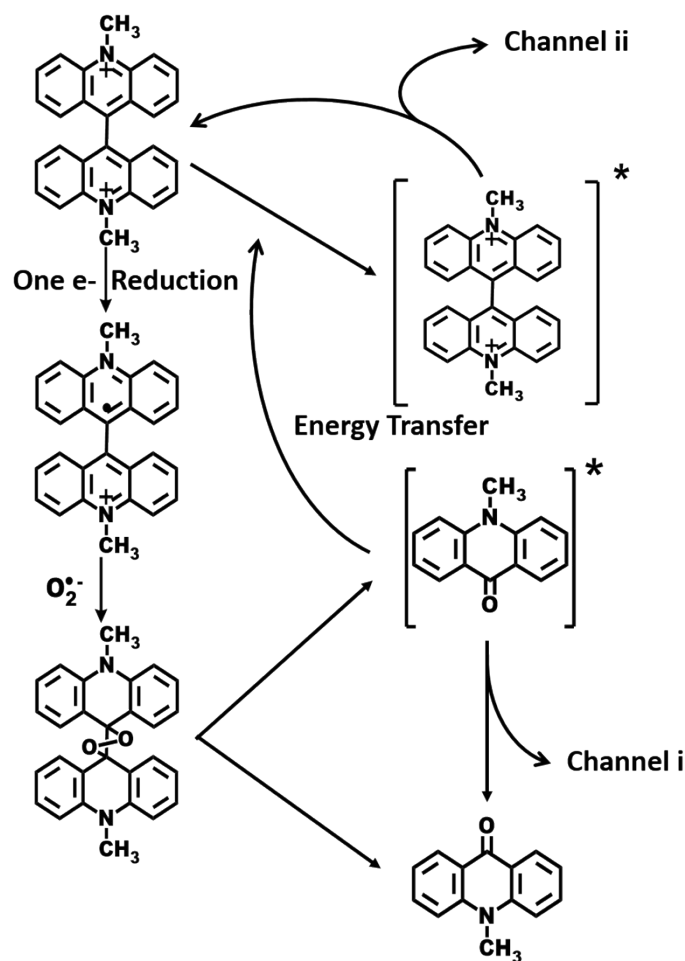

**Fig.. S6.** CL reaction pathways of lucigenin- $\text{H}_2\text{O}_2$  in alkaline solution.

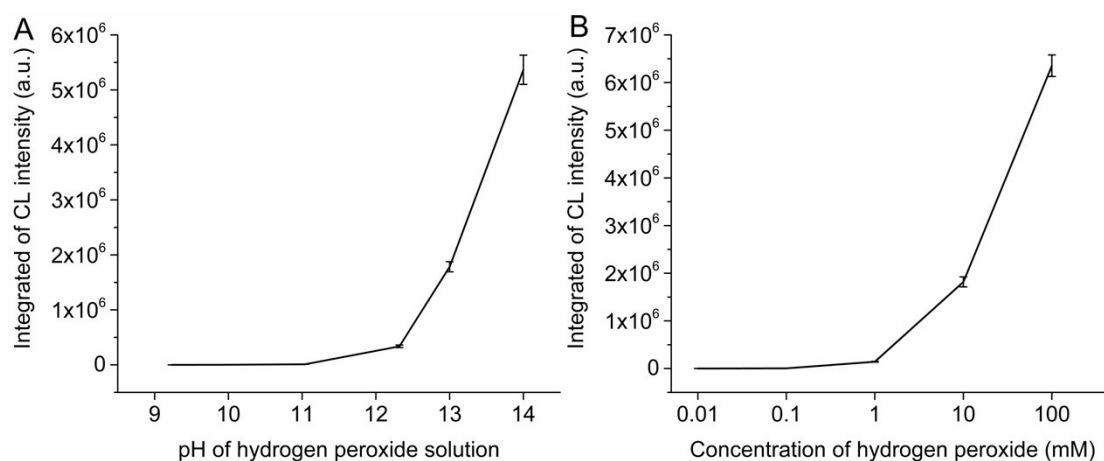

**Fig. S7.** Effect of pH (A) and (B) concentration of  $\text{H}_2\text{O}_2$  on CL intensities of  $\text{Co}(\text{Trp})_2/\text{Luc}/\text{GO}$ . CL measurement: a BPLC luminometer at -600 V PMT.
